# Supplementary material
Source: PubMed Central journal article supplement (PMC2667005)
Supplement: 0901173106_0901173106SI.pdf [file 0901173106_0901173106SI.pdf]

# Supporting Information

Li et al. 10.1073/pnas.0901173106

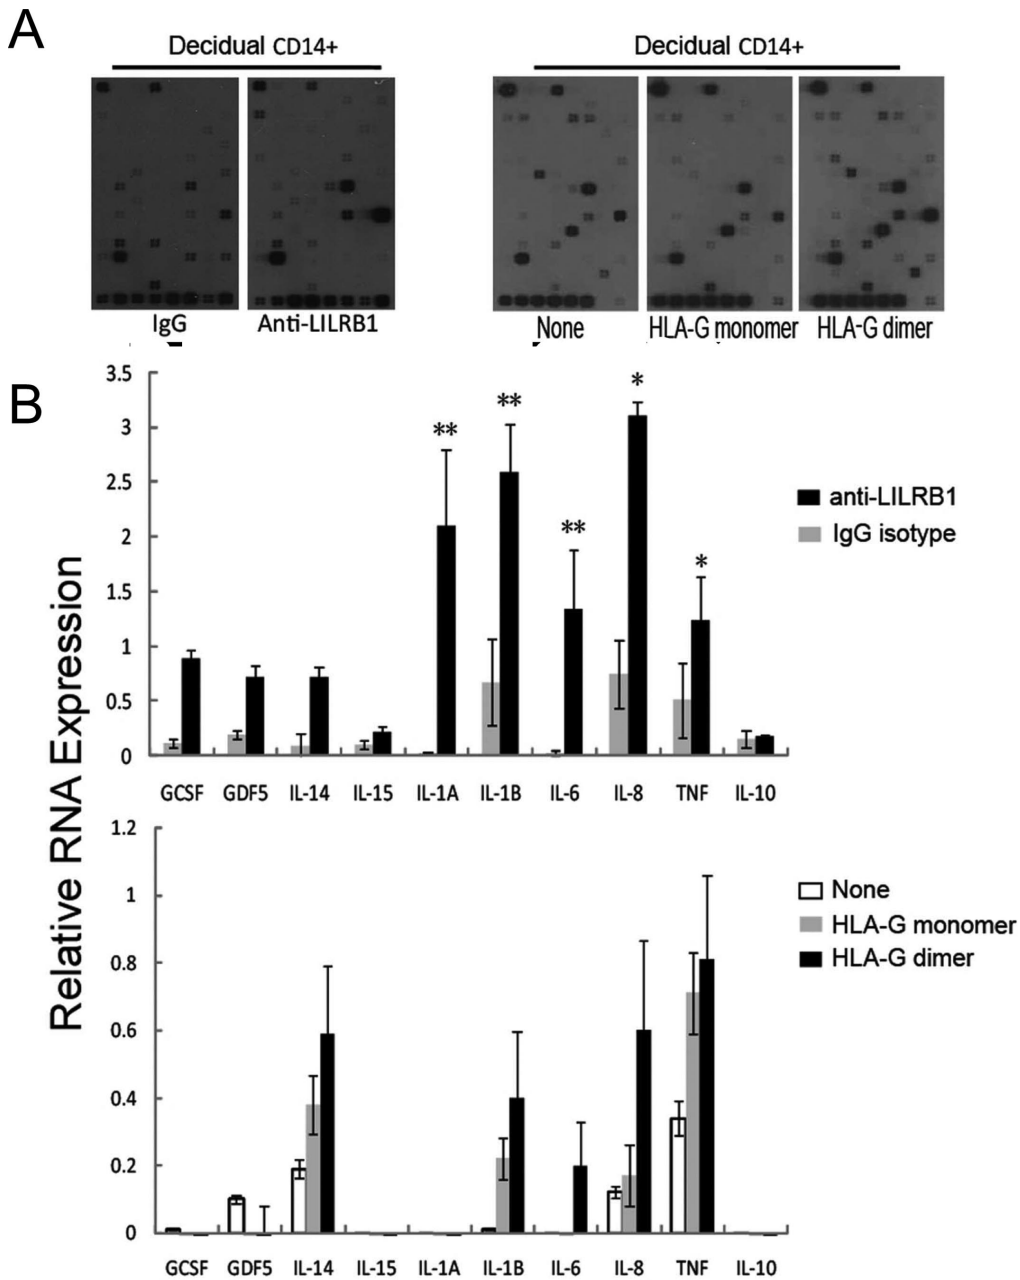

**Fig. S1.** Anti-LILRB1 antibody and HLA-G homodimer induce similar proinflammatory cytokine gene profiles in decidual macrophages. (A) Decidual CD14<sup>+</sup> lymphocytes were cultured for 5 h in the presence of anti-LILRB1 antibody (10  $\mu$ g/mL) and goat anti-mouse IgG secondary antibody (5  $\mu$ g/mL) (Left) or in a 1:1 ratio with untransfected 721.221 cells (None), 721.221 cells transfected with HLA-G monomer, or 721.221 cells transfected with HLA-G homodimer (Right). Total RNA was isolated and biotinylated cRNAs were used as probes. Hybridization was performed to a common cytokine Superarray membrane as described in *Materials and Methods*. The arrays were exposed to X-ray film, and 1 representative of 4 images is shown. (B) Expression was normalized to GAPDH. The average of 4 experiments is shown. Decidual CD14<sup>+</sup> lymphocytes produce a proinflammatory cytokine profile upon (Upper) anti-LILRB1 stimulation (black bars) and isotype controls (gray bars), or (Lower) coculture with 721.221 (white bars), 721.221 cells transfected with HLA-G monomer (gray bars), or 721.221 cells transfected with HLA-G homodimer (black bars). \*,  $P < 0.05$ ; \*\*,  $P < 0.01$ . (C) Gene table for oligonucleotide GEArray human common cytokines microarray (OHS-021). For more information about gene names please visit <http://www.sabiosciences.com/genetable.php?pcatn = ohs-021>.

C

|                |                |                 |                 |                |                |                |                 |
|----------------|----------------|-----------------|-----------------|----------------|----------------|----------------|-----------------|
| RPS27A<br>1    | AREG<br>2      | SLURP1<br>3     | ATP6AP1<br>4    | BMP1<br>5      | BMP10<br>6     | BMP15<br>7     | BMP2<br>8       |
| BMP3<br>9      | BMP4<br>10     | BMP5<br>11      | BMP6<br>12      | BMP7<br>13     | BMP8B<br>14    | CSF1<br>15     | CSF2<br>16      |
| CSF3<br>17     | CYFIP2<br>18   | LEFTY2<br>19    | FAM3B<br>20     | FAM3C<br>21    | FGF10<br>22    | FIGF<br>23     | FLT3LG<br>24    |
| LASS1<br>25    | GDF10<br>26    | GDF11<br>27     | GDF15<br>28     | GDF2<br>29     | GDF3<br>30     | GDF5<br>31     | MSTN<br>32      |
| GDF9<br>33     | IFNA1<br>34    | IFNA13<br>35    | IFNA14<br>36    | IFNA2<br>37    | IFNA4<br>38    | IFNA5<br>39    | IFNA8<br>40     |
| IFNB1<br>41    | IFNG<br>42     | IFNK<br>43      | IFNW1<br>44     | IK<br>45       | IL10<br>46     | IL11<br>47     | IL12A<br>48     |
| IL12B<br>49    | IL13<br>50     | TXLNA<br>51     | IL15<br>52      | IL16<br>53     | IL17A<br>54    | IL17B<br>55    | IL17C<br>56     |
| IL25<br>57     | IL17F<br>58    | IL18<br>59      | IL19<br>60      | IL1A<br>61     | IL1B<br>62     | IL1F10<br>63   | IL1F5<br>64     |
| IL1F6<br>65    | IL1F7<br>66    | IL1F8<br>67     | IL1F9<br>68     | IL2<br>69      | IL20<br>70     | IL21<br>71     | IL22<br>72      |
| IL24<br>73     | IL26<br>74     | IL3<br>75       | IL4<br>76       | IL5<br>77      | IL6<br>78      | IL7<br>79      | IL8<br>80       |
| IL9<br>81      | INHA<br>82     | INHBA<br>83     | INHBB<br>84     | LTA<br>85      | LTB<br>86      | MDK<br>87      | NODAL<br>88     |
| PDGFA<br>89    | PDGFB<br>90    | PTN<br>91       | SPP1<br>92      | TGFA<br>93     | TGFB1<br>94    | TGFB2<br>95    | TGFB3<br>96     |
| THPO<br>97     | TNF<br>98      | TNFRSF11B<br>99 | TNFSF10<br>100  | TNFSF11<br>101 | TNFSF12<br>102 | TNFSF13<br>103 | TNFSF13B<br>104 |
| TNFSF14<br>105 | TNFSF15<br>106 | TNFSF18<br>107  | TNFSF4<br>108   | CD40LG<br>109  | FASLG<br>110   | CD70<br>111    | TNFSF8<br>112   |
| TNFSF9<br>113  | VEGFA<br>114   | PUC18<br>115    | VEGFB<br>116    | Blank<br>117   | AS1R2<br>118   | AS1R1<br>119   | AS1<br>120      |
| GAPDH<br>121   | B2M<br>122     | HSP90AB1<br>123 | HSP90AB1<br>124 | ACTB<br>125    | ACTB<br>126    | BAS2C<br>127   | BAS2C<br>128    |

Fig. S1. Continued.

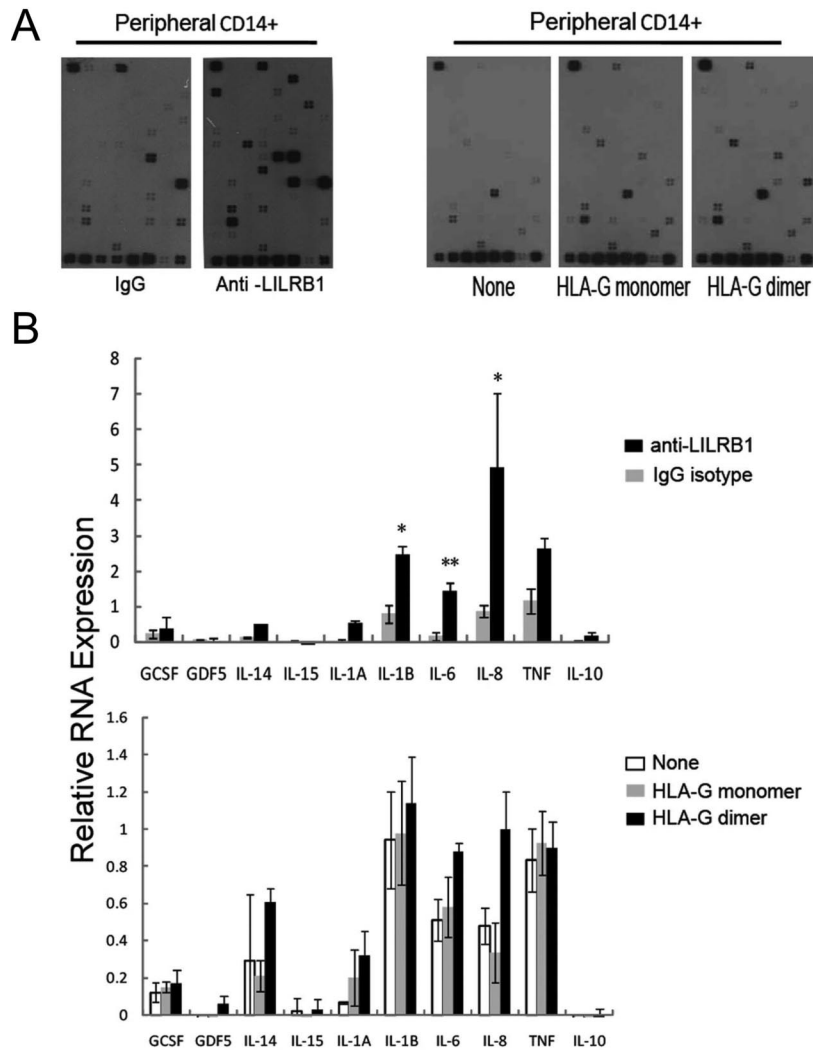

**Fig. S2.** Anti-LILRB1 antibody and HLA-G homodimer induce similar proinflammatory cytokine profiles in CD14<sup>+</sup> peripheral blood monocytes. (A) Peripheral CD14<sup>+</sup> lymphocytes were cultured for 5 h in the presence of anti-LILRB1 antibody (10 µg/mL) and goat anti-mouse IgG secondary antibody (5 µg/mL) (*Left*) or in a 1:1 ratio with untransfected 721.221 cells (None), 721.221 cells transfected with HLA-G monomer, or 721.221 cells transfected with HLA-G homodimer (*Right*). Total RNA was isolated, and biotinylated cRNAs were used as probes. Hybridization was performed to a common cytokine Superarray membrane as described in *Materials and Methods*. The arrays were exposed to X-ray film, and 1 representative of 3 images is shown. (B) Expression was normalized to GAPDH. The average of 3 experiments is shown. Peripheral CD14<sup>+</sup> lymphocytes produce a proinflammatory cytokine profile upon (*Upper*) anti-LILRB1 stimulation (black bars) and isotype controls (gray bars), or (*Lower*) coculture with 721.221 (white bars), 721.221 cells transfected with HLA-G monomer (gray bars), or 721.221 cells transfected with HLA-G homodimer (black bars). \*,  $P < 0.05$ ; \*\*,  $P < 0.01$ . Note the scale in *B Upper* is compressed 2-fold relative to that in *Fig. S1B Upper* because the mRNA levels for IL-8 in peripheral CD14<sup>+</sup> cells were approximately twice that in decidual CD14<sup>+</sup> cells.

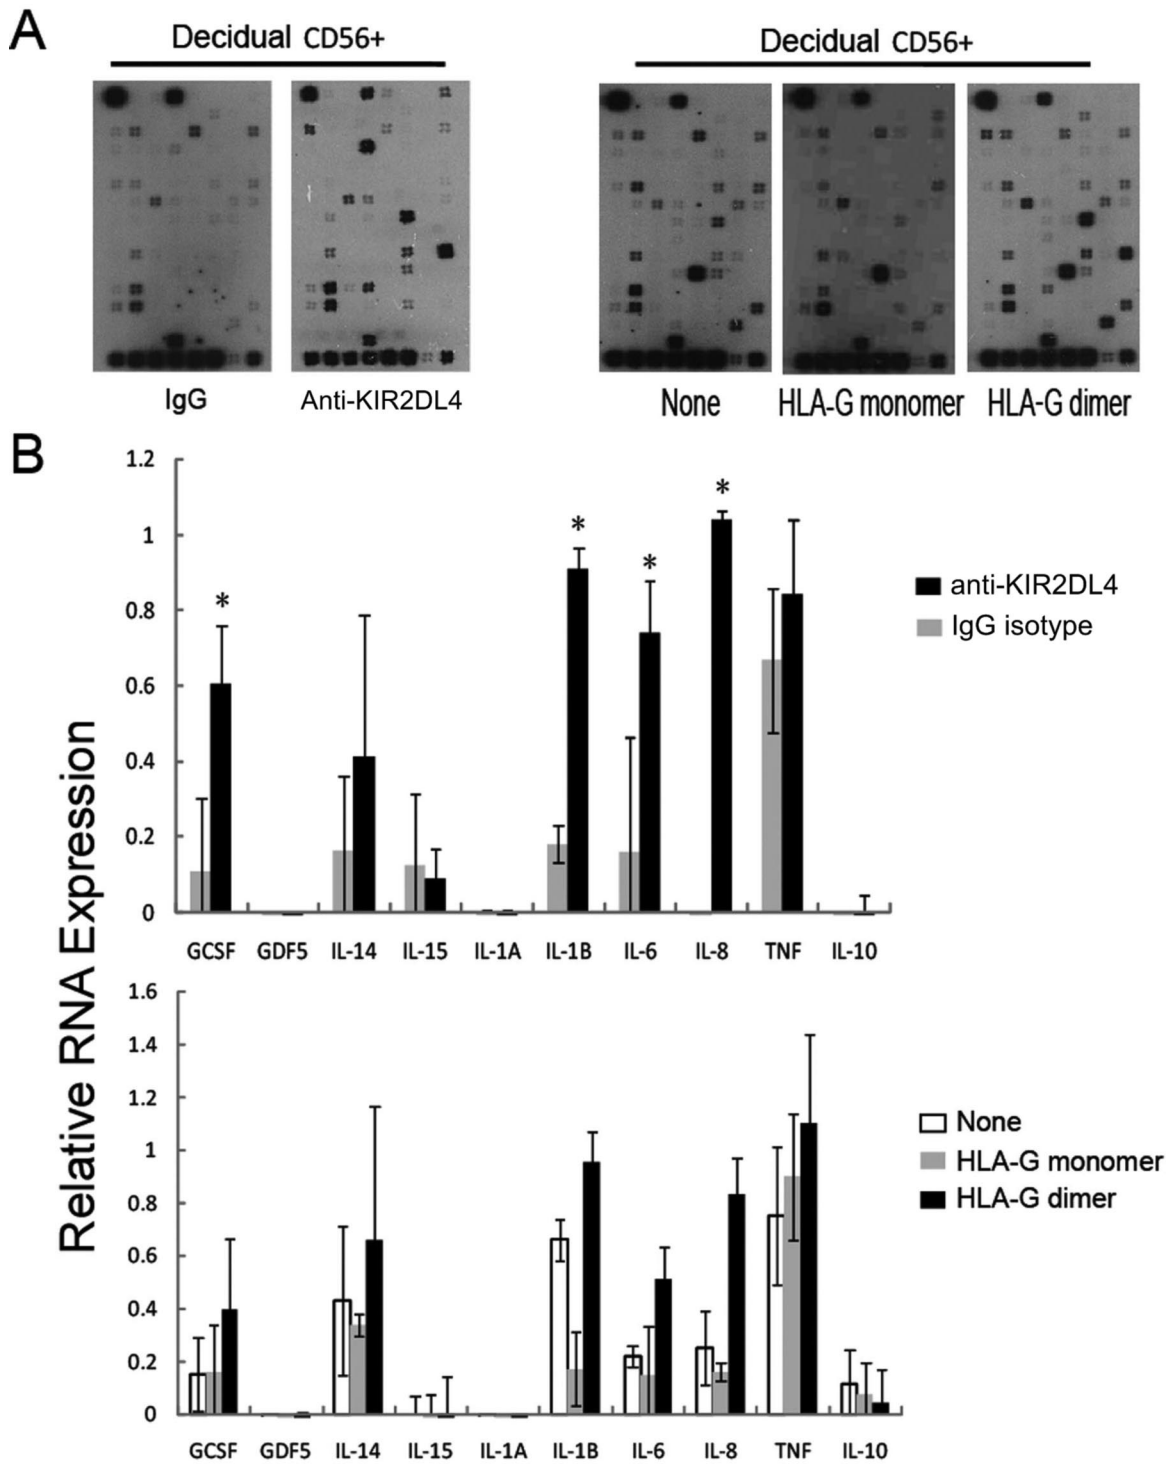

**Fig. S3.** Anti-KIR2DL4 antibody and HLA-G homodimer up-regulate proinflammatory cytokine genes on decidual CD56<sup>+</sup> lymphocytes. (A) Decidual CD56<sup>+</sup> lymphocytes were cultured for 5 h in the presence of anti-KIR2DL4 antibody (10  $\mu$ g/mL) and goat anti-mouse IgG secondary antibody (5  $\mu$ g/mL) (Left) or in a 1:1 ratio with untransfected 721.221 cells (None), 721.221 cells transfected with HLA-G monomer, or 721.221 cells transfected with HLA-G homodimer (Right). Total RNA was isolated, and biotinylated cRNAs were used as probes. Hybridization was performed to a common cytokine Superarray membrane as described in *Materials and Methods*. The arrays were exposed to X-ray film and 1 representative of 4 images is shown. (B) Expression was normalized to GAPDH. The average of 4 experiments is shown. Decidual CD56<sup>+</sup> lymphocytes produce a proinflammatory cytokine profile upon (Upper) anti-KIR2DL4 stimulation (black bars) and isotype controls (gray bars), or (Lower) coculture with 721.221 (white bars), 721.221 cells transfected with HLA-G monomer (gray bars), or 721.221 cells transfected with HLA-G homodimer (black bars).\*,  $P < 0.05$ .

Table S1. Genes constitutively expressed in various cell types

| Gene Name<br>(Position) | Peripheral<br>CD14 <sup>+</sup><br>Monocytes | Decidual<br>CD14 <sup>+</sup><br>Macrophages | Decidual<br>CD56 <sup>+</sup> NK cells |
|-------------------------|----------------------------------------------|----------------------------------------------|----------------------------------------|
| CSF3 (17)               |                                              | +                                            | +                                      |
| CYFIP2 (18)             |                                              | +                                            | +                                      |
| BMP8B (14)              |                                              | +/-                                          |                                        |
| LASS1 (25)              |                                              |                                              | +/-                                    |
| GDF3 (30)               |                                              |                                              | +/-                                    |
| FAM3C (21)              |                                              | +                                            | +                                      |
| FGF10 (22)              |                                              | +                                            |                                        |
| FLT3LG (24)             |                                              | +/-                                          | +                                      |
| IL12A (48)              |                                              | +/-                                          | +                                      |
| IL10 (46)               |                                              |                                              | +                                      |
| IFNB (41)               |                                              |                                              | +/-                                    |
| IFNG (42)               |                                              |                                              | ++                                     |
| IL13 (50)               | +/-                                          |                                              | +/-                                    |
| TXLNA (51)              |                                              | ++                                           | +                                      |
| IL15 (52)               |                                              |                                              | +/-                                    |
| IL17B (55)              |                                              |                                              | +                                      |
| IL17C (56)              |                                              |                                              | +/-                                    |
| IL18 (59)               | +                                            |                                              |                                        |
| IL19 (60)               |                                              |                                              | +/-                                    |
| IL1A (61)               |                                              | +/-                                          |                                        |
| IL1B (62)               |                                              | +++                                          | ++                                     |
| IL20 (70)               | +                                            |                                              |                                        |
| IL26 (74)               |                                              | +/-                                          | ++                                     |
| IL6 (78)                |                                              | +                                            | +                                      |
| IL7 (79)                |                                              |                                              | +/-                                    |
| IL8 (80)                | +                                            | ++                                           |                                        |
| LTA (85)                | ++                                           | ++                                           | +++                                    |
| LTB (86)                |                                              |                                              | +                                      |
| PDGFB (90)              | +                                            | +/-                                          | ++                                     |
| SPP1 (92)               |                                              | +                                            |                                        |
| THPO (97)               |                                              |                                              | +/-                                    |
| TNF (98)                | ++                                           | +++                                          | ++                                     |
| TNFSF4 (108)            |                                              |                                              | +/-                                    |
| CD70 (111)              | +                                            | +                                            | +                                      |
| VEGFB (116)             | ++                                           | ++                                           | +++                                    |

This chart was made by evaluating the intensity of the hybridization spots in the Superarray in Figs. S1–S3, which were obtained after incubation with untransfected 721.221 cells; this is a qualitative estimate. Gene position refers to the number shown in Fig. 1C. Differences between decidual CD14<sup>+</sup> and CD56<sup>+</sup> NK cells are highlighted. Scores are given as +++ for the highest intensity observed, whereas +/- indicates the lowest intensity observed.
